# Supplementary material for: Fluorescence ‘off–on–off’ signaling with zinc ensemble: a new array of investigating prevalence of ATP in liver cancer cells
Source: Royal Society of Chemistry journal article supplement (doi:10.1039/d1nj00051a), 2021-01-01
Supplement: d1nj00051a1.pdf [file d1nj00051a1.pdf]

## **Supporting information**

### **Fluorescence 'off-on-off' signaling with Zinc ensemble: A new array of investigating prevalence of ATP in liver cancer cells**

Shampa Kundu<sup>a</sup>, Md Majharul Islam<sup>b</sup>, Sukhendu Mandal<sup>b</sup> and Prithidipa Sahoo<sup>a\*</sup>

<sup>a</sup>Department of Chemistry, Visva-Bharati University, Santiniketan-731235, India

Email: prithidipa@hotmail.com

<sup>b</sup>Department of Microbiology, University of Calcutta, Kolkata-700073, India

# 1. NMR Studies:

## <sup>1</sup>H NMR of NPAC in DMSO-d<sub>6</sub>:

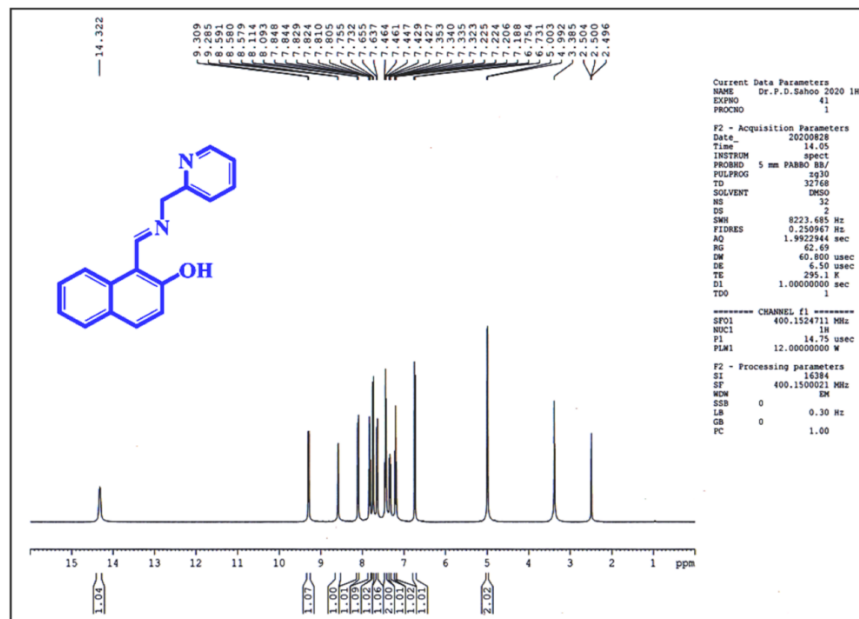

Fig. S1. <sup>1</sup>H NMR of NPAC in DMSO-d<sub>6</sub> (400 MHz).

## <sup>13</sup>C NMR of NPAC in DMSO-d<sub>6</sub>:

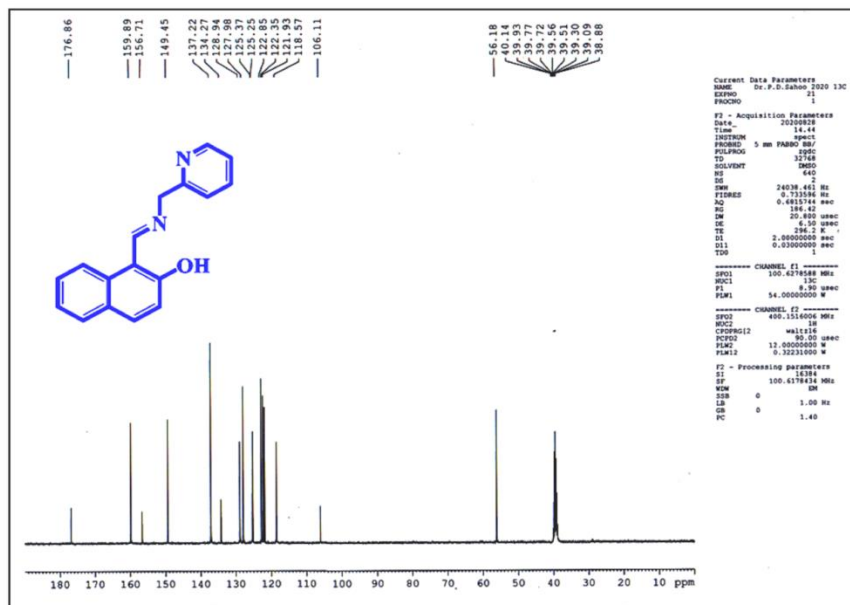

Fig. S2 <sup>13</sup>C NMR of NPAC in DMSO-d<sub>6</sub> (400 MHz).

## 2. $^{13}\text{C}$ NMR titration spectrum of NPAC with $\text{Zn}^{2+}$ & ATP :

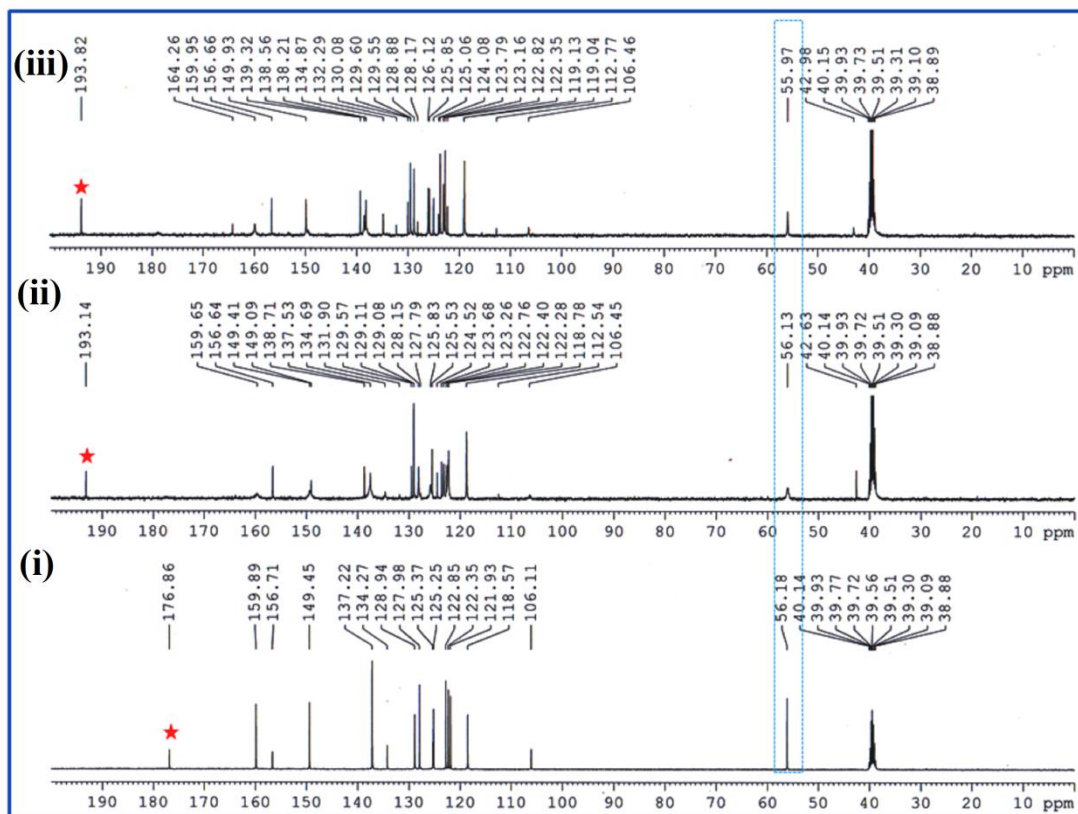

**Fig. S3**  $^{13}\text{C}$  NMR titration [400MHz] of NPAC in  $\text{DMSO-d}_6$  at  $25^\circ\text{C}$  and the corresponding changes after consecutive addition of  $\text{Zn}^{2+}$  & ATP in  $\text{D}_2\text{O}$  where (i) only NPAC (ii) NPAC + 0.5 equiv. of  $\text{Zn}^{2+}$ , (iii)  $[\text{NPAC-Zn}^{2+}] + 1$  equiv. of ATP.

### 3. Partial HRMS of the mixed assay system:

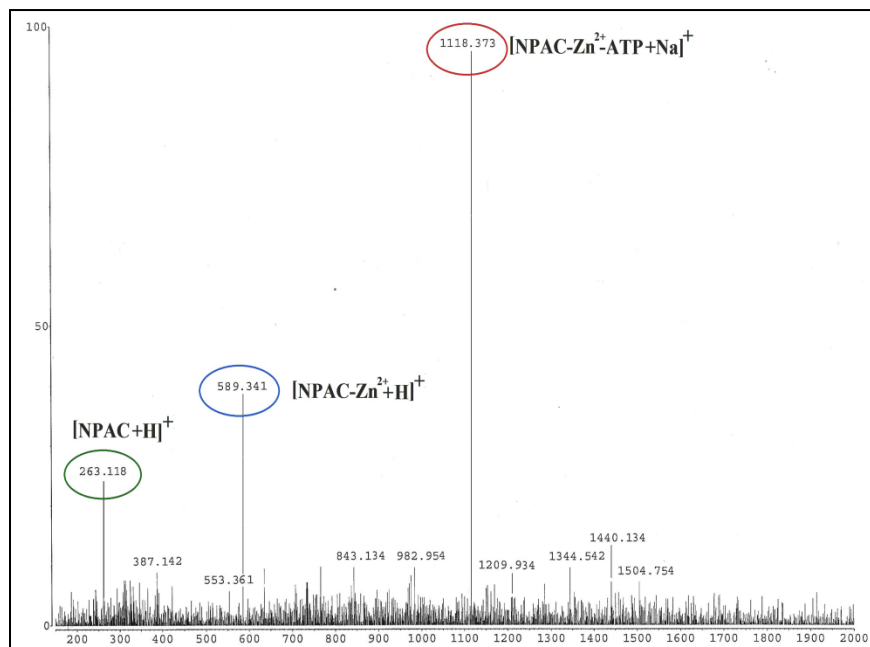

Fig. S4. Partial HRMS spectra of [NPAC-Zn<sup>2+</sup>-ATP] mixture in acetonitrile.

### 4. Absorbance & Fluorescence study of NPAC with Zn<sup>2+</sup>:

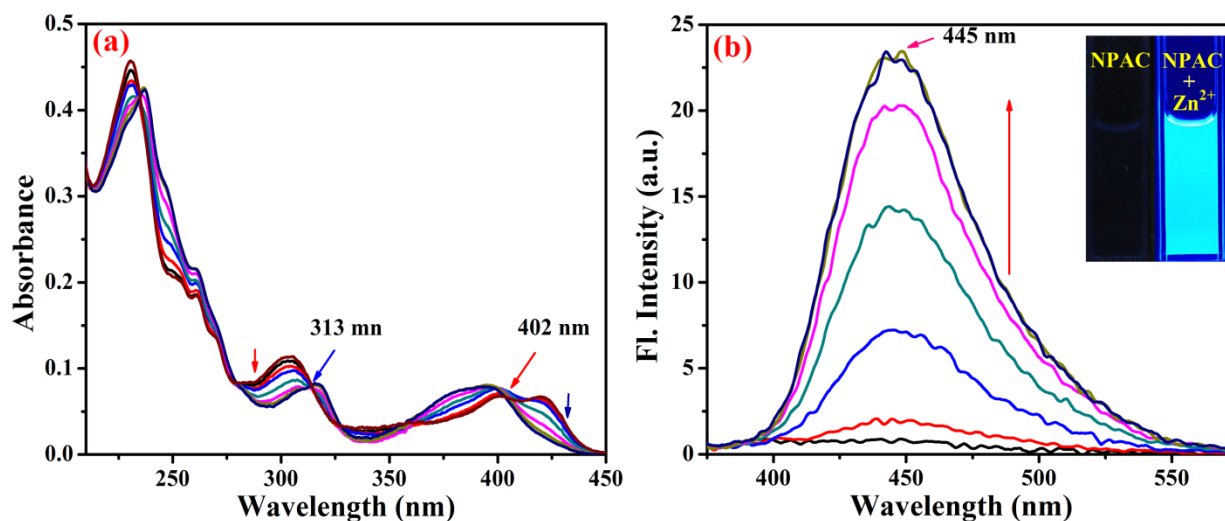

Fig. S5 UV-vis absorption spectra of NPAC (1  $\mu$ M) upon gradual addition of Zn<sup>2+</sup> up to 0.6 equiv. in CH<sub>3</sub>CN:H<sub>2</sub>O (1:9, v/v) at pH 7.0 (10 mM phosphate buffer). (b) Fluorescence emission spectra at 445 nm ( $\lambda_{\text{ex}} = 350$  nm) of NPAC (1  $\mu$ M) upon addition of Zn<sup>2+</sup> upto 0.6 equiv. in

CH<sub>3</sub>CN: H<sub>2</sub>O (1:9, v/v) at pH 7.0 (10 mM phosphate buffer). [Inset: Fluorescence color changes of NPAC and NPAC + Zn<sup>2+</sup> in neutral aqueous medium].

**5. Job's plot for NPAC determining the binding stoichiometry towards Zn<sup>2+</sup> by fluorescence method:**

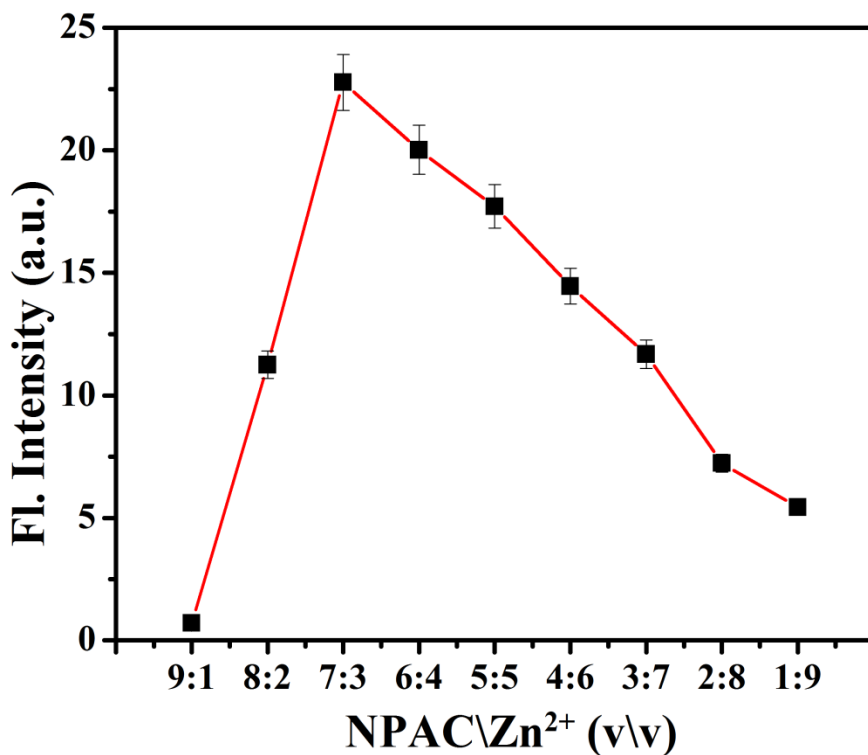

**Fig. S6** Job's plot of NPAC ( $c = 1 \mu\text{M}$ ) with Zn<sup>2+</sup> ( $1 \mu\text{M}$ ) in acetonitrile-water (1:9, v/v) at neutral pH (pH 7.0, 10 mM phosphate buffer) by fluorescence method, which indicate 2:1 stoichiometry for NPAC with Zn<sup>2+</sup>. Standard deviations are represented by error bar ( $n=3$ ).

## 6. Calculation of binding constants of NPAC towards $Zn^{2+}$ :

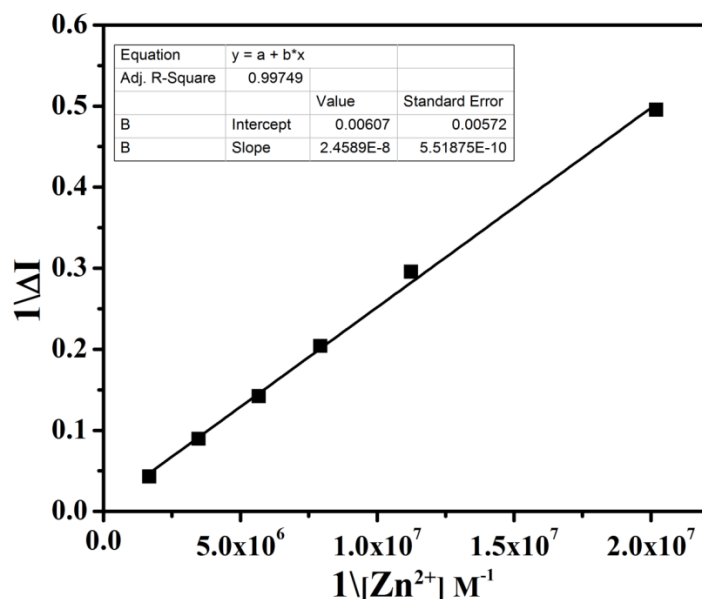

**Fig. S7** Linear regression analysis for the calculation of binding constant values of NPAC towards  $Zn^{2+}$ .

The association const. ( $K_a$ ) of NPAC for sensing  $Zn^{2+}$  was determined from the equation:  $K_a = \text{intercept}/\text{slope}$ . From the linear fit graph we get intercept = 0.00607, slope =  $2.4589 \times 10^{-8}$ . Thus we get,  $K_a = (0.00607) / (2.4589 \times 10^{-8}) = 0.24 \times 10^6 M^{-1}$ .

## 7. Calculation of limit of detection (LOD) of NPAC with $Zn^{2+}$ :

The detection limit of the chemosensor NPAC for  $Zn^{2+}$  was calculated on the basis of fluorescence titration. To determine the standard deviation for the fluorescence intensity, the emission intensity of four individual receptors without  $Zn^{2+}$  was measured by 10 times and the standard deviation of blank measurements was calculated.

The limit of detection (LOD) of NPAC for sensing  $Zn^{2+}$  was determined from the following equation<sup>1</sup>.

$$LOD = K \times SD/S$$

Where  $K = 2$  or  $3$  (we take  $3$  in this case);  $SD$  is the standard deviation of the blank receptor solution;  $S$  is the slope of the calibration curve.

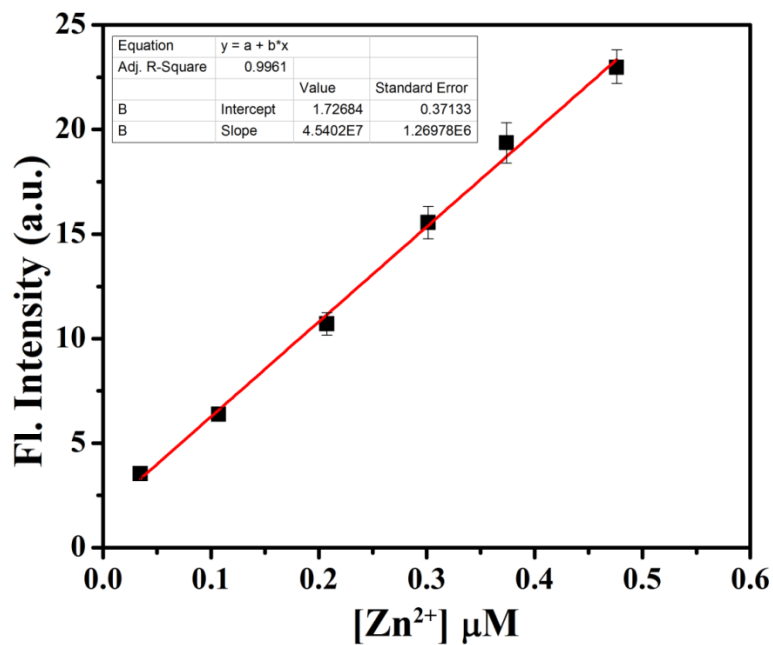

**Fig. S8** Linear fit curve of NPAC at 445 nm with respect to  $Zn^{2+}$  concentration. Standard deviations are represented by error bar (n=3).

From the linear fit graph we get slope =  $4.5402 \times 10^7$ , and SD value is 0.47143. Thus using the above formula we get the Limit of Detection =  $0.31 \times 10^{-7}$  M, i.e 31 nM. Therefore NPAC can detect  $Zn^{2+}$  up to this very lower concentration by fluorescence technique.

## 8. Calculation of binding constants of NPAC-Zn<sup>2+</sup> complex towards ATP:

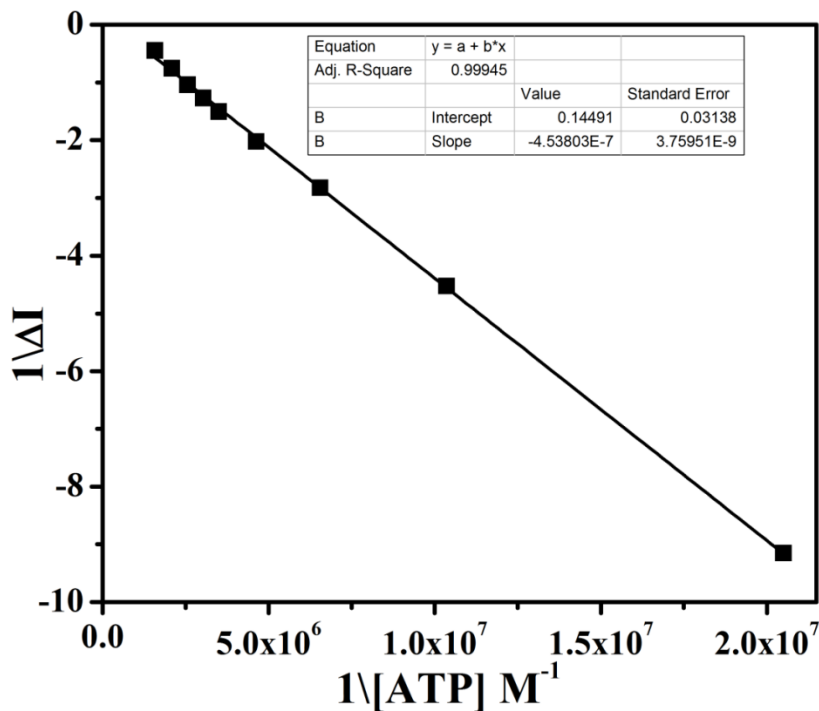

**Fig. S9** Linear regression analysis for the calculation of binding constant values of NPAC-Zn<sup>2+</sup> complex towards ATP.

The association const. ( $K_a$ ) of NPAC-Zn<sup>2+</sup> complex for sensing ATP was determined from the equation:  $K_a = \text{intercept/slope}$ . From the linear fit graph we get intercept= 0.14491, slope =  $4.53803 \times 10^{-7}$ . Thus we get,  $K_a = (0.14491) / (4.53803 \times 10^{-7}) = 0.31 \times 10^6 \text{ M}^{-1}$ .



## 9. Calculation of limit of detection (LOD) of NPAC -Zn<sup>2+</sup> complex with ATP:

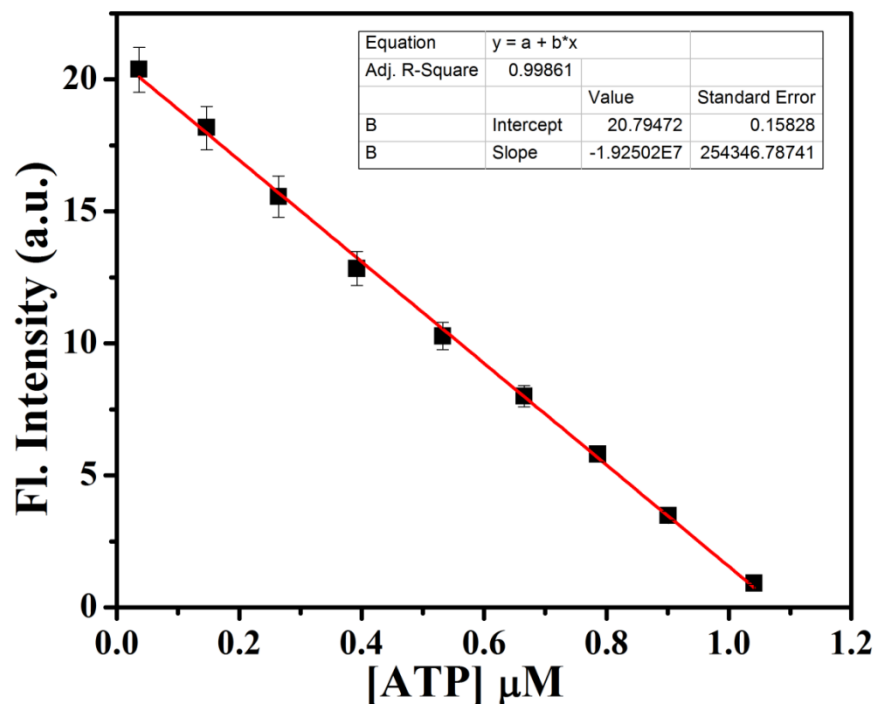

**Fig. S10** Linear fit curve of NPAC-Zn<sup>2+</sup> at 445 nm with respect to ATP concentration. Standard deviations are represented by error bar (n=3).

From the linear fit graph we get slope =  $1.92502 \times 10^7$ , and SD value is 0.24959

Thus using the above formula we get the Limit of Detection =  $0.39 \times 10^{-7}$  M, i.e 39 nM. Therefore, NPAC-Zn<sup>2+</sup> can detect ATP up to this very lower concentration by fluorescence technique.

**10. Job's plot for NPAC-Zn<sup>2+</sup> complex determining the binding stoichiometry towards ATP by fluorescence method:**

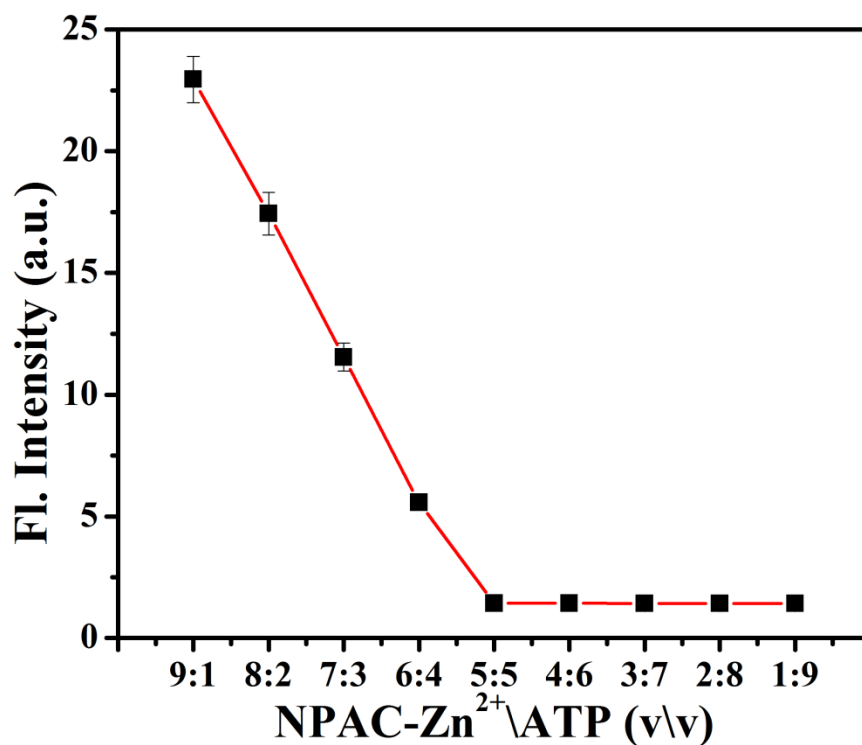

**Fig. S11** Job's plot of NPAC-Zn<sup>2+</sup> (c =1  $\mu$ M) with ATP (1  $\mu$ M) in acetonitrile-water (1:9, v/v) at neutral pH (pH 7.0, 10 mM phosphate buffer) by fluorescence method, which indicate 1:1 stoichiometry for NPAC-Zn<sup>2+</sup> complex with ATP. Standard deviations are represented by error bar (n=3).

## 11. Competitive fluorescence studies of NPAC with different metal ions:

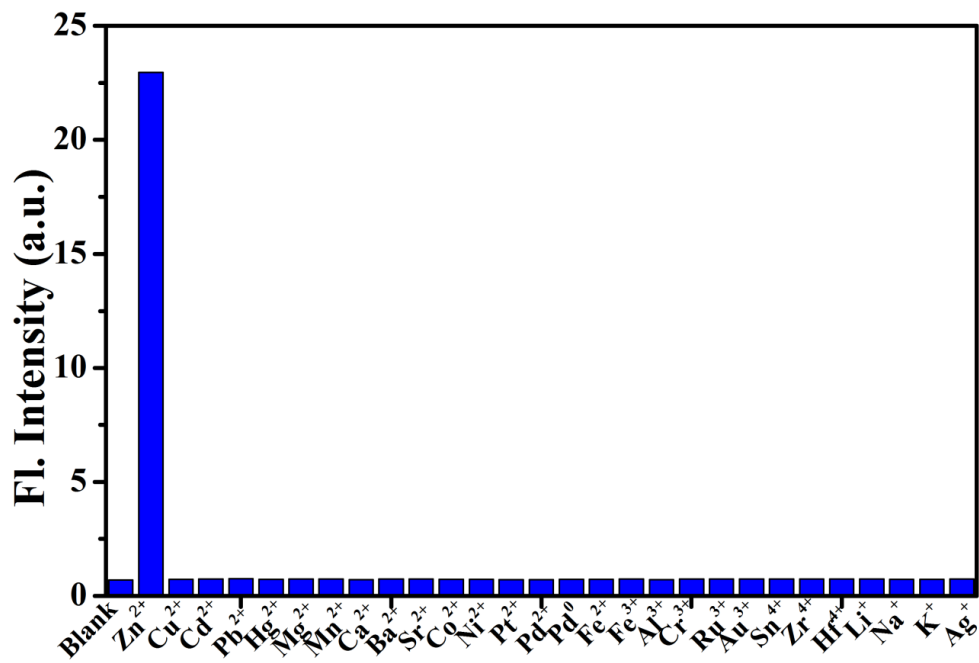

**Fig. S12** Histogram representing competitive fluorescence spectra of NPAC with different metal ions at 445 nm ( $\lambda_{\text{ex}} = 350$  nm) in CH<sub>3</sub>CN-H<sub>2</sub>O (1:9, v/v) at neutral pH (pH 7.0, 10 mM phosphate buffer).

## 12. Competitive fluorescence studies of NPAC-Zn<sup>2+</sup> complex with various nucleotides and biological phosphates

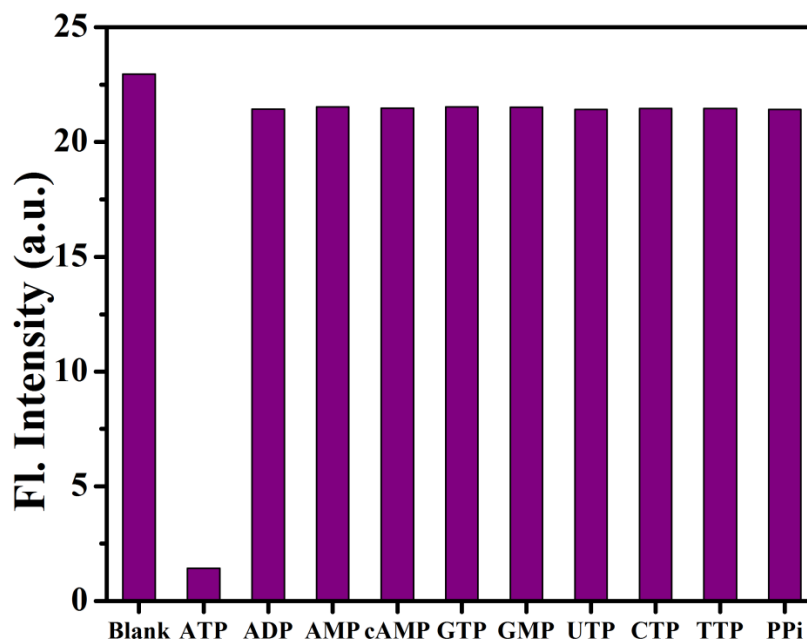

**Fig. S13** Histogram representing competitive fluorescence spectra of NPAC-Zn<sup>2+</sup> complex with various nucleotides and biological phosphates at 445 nm ( $\lambda_{ex}$  = 350 nm) in CH<sub>3</sub>CN-H<sub>2</sub>O (1:9, v/v) at neutral pH (pH 7.0, 10 mM phosphate buffer).

13. pH titration curve of NPAC upon addition of  $Zn^{2+}$  and NPAC- $Zn^{2+}$  complex upon gradual addition of ATP:

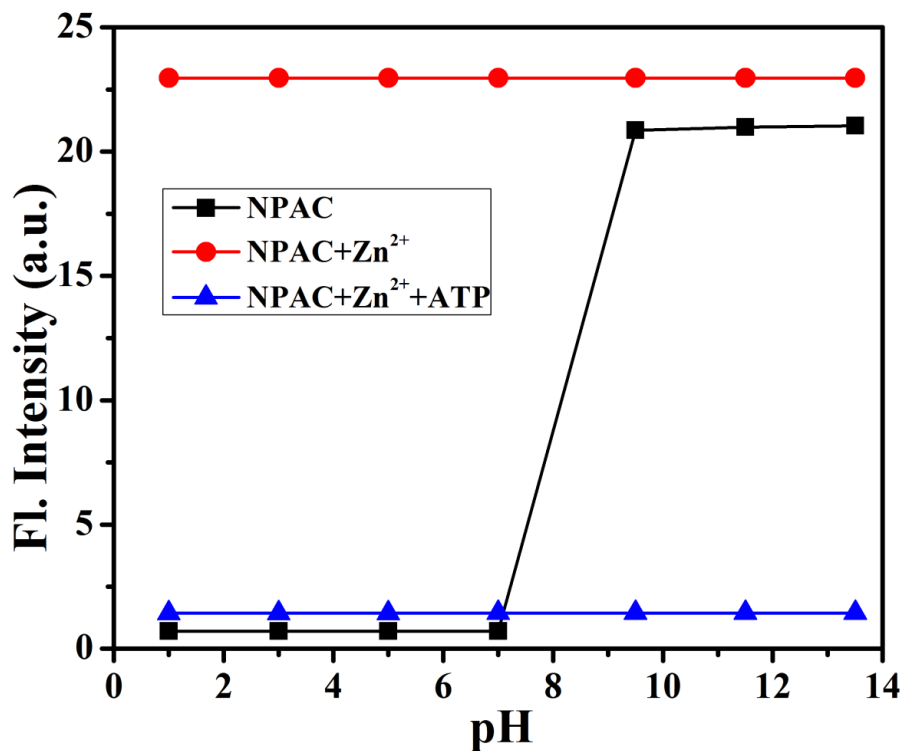

**Fig. S14** Effect of pH on the fluorescence intensity of NPAC (1  $\mu$ M) in the absence of  $Zn^{2+}$  (black line) and in the presence of  $Zn^{2+}$  (10  $\mu$ M, red line) and effect of pH on the fluorescence intensity of NPAC- $Zn^{2+}$  complex in the presence of ATP (blue line).

## 14. Details of energy calculations using Density Functional Theory (DFT):

Binding of NPAC with  $Zn^{2+}$  and NPAC- $Zn^{2+}$  with ATP has been investigated by quantum chemical calculations at the DFT level LANL2DZ/6-31G\*\* method basis set implemented at Gaussian 09 program. Solvent effects were incorporated using CPCM solvent model.

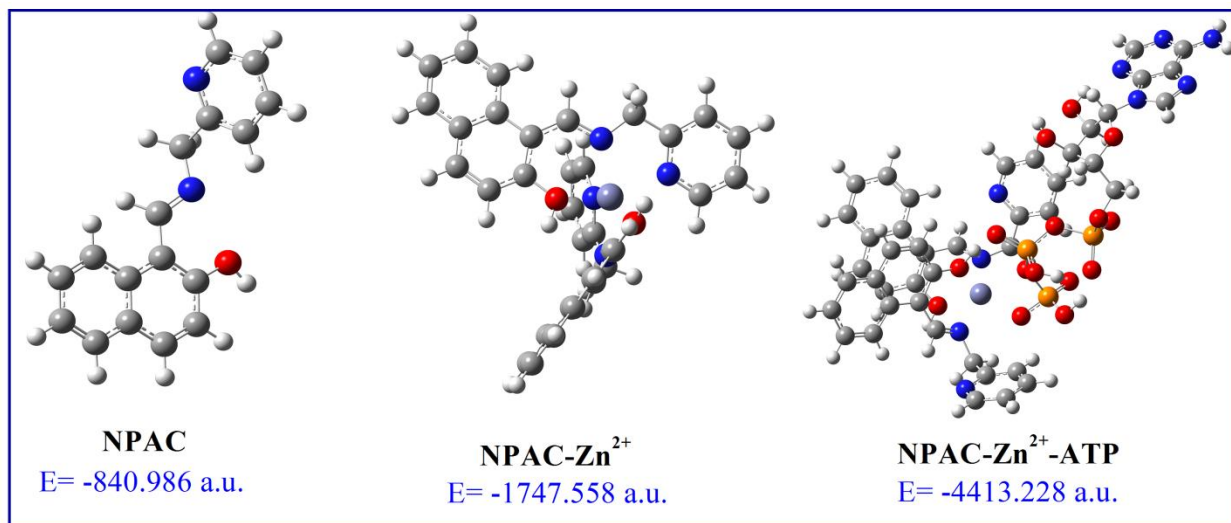

**Fig. S15** Energy optimized geometries of NPAC, NPAC- $Zn^{2+}$ , NPAC- $Zn^{2+}$ -ATP and obtained at the LANL2DZ /6-31G\*\* levels of theory with CPCM solvation ( $H_2O$ ).

**Table S1.** Details of the geometry optimization in Gaussian 09 program.

| Details              | NPAC     | NPAC- $Zn^{2+}$ | [NPAC- $Zn^{2+}$ ]-ATP | ATP       |
|----------------------|----------|-----------------|------------------------|-----------|
| Calculation method   | B3LYP    | B3LYP           | B3LYP                  | B3LYP     |
| Basis set            | 6-31G**  | 6-31G**         | 6-31G**                | 6-31G**   |
| E(CAM-B3LYP) (a.u.)  | -840.986 | 1747.558        | -4413.228              | -2666.779 |
| Charge, Multiplicity | 0, 1     | 2, 2            | 2, 2                   | 0, 1      |
| Solvent (CPCM)       | Water    | Water           | Water                  | Water     |

**Table S2.** Selected electronic excitation energies (eV), oscillator strengths (f), main configurations of the low-lying excited states of all the molecules and complexes. The data were calculated by TDDFT//B3LYP/6-31G(d,p) based on the optimized ground state geometries.

| Molecules | Electronic Transition | Excitation Energy <sup>a</sup> | f <sup>b</sup> | Composition <sup>c</sup> (%) |
|-----------|-----------------------|--------------------------------|----------------|------------------------------|
|-----------|-----------------------|--------------------------------|----------------|------------------------------|

|                              |                          |                     |        |                               |
|------------------------------|--------------------------|---------------------|--------|-------------------------------|
| NPAC                         | $S_0 \rightarrow S_1$    | 3.8187 eV 324.68 nm | 0.2348 | H $\rightarrow$ L (68.7%)     |
|                              | $S_0 \rightarrow S_3$    | 4.3030 eV 288.13nm  | 0.0431 | H-1 $\rightarrow$ L (29%)     |
| [NPAC-Zn <sup>2+</sup> ]     | $S_0 \rightarrow S_{12}$ | 3.1439 eV 394.37 nm | 0.1510 | H-1 $\rightarrow$ L (58.9%)   |
|                              | $S_0 \rightarrow S_{17}$ | 3.8206 eV 324.51nm  | 0.0581 | H-2 $\rightarrow$ L (20%)     |
| [NPAC-Zn <sup>2+</sup> ]-ATP | $S_0 \rightarrow S_4$    | 3.6316 eV 341.40 nm | 0.1854 | H-1 $\rightarrow$ L+1 (69.6%) |
|                              | $S_0 \rightarrow S_6$    | 3.9301 eV 315.48 nm | 0.0668 | H-3 $\rightarrow$ L (19%)     |

<sup>a</sup>Only selected excited states were considered. The numbers in parentheses are the excitation energy in wavelength. <sup>b</sup>Oscillator strength. <sup>c</sup>H stands for HOMO and L stands for LUMO.

**Table S3.** Energies of the highest occupied molecular orbital (HOMO) and lowest unoccupied molecular orbital (LUMO)

| Species                      | $E_{\text{HOMO}}$<br>(a.u.) | $E_{\text{LUMO}}$<br>(a.u.) | $\Delta E$ (a.u.) | $\Delta E$ (eV) | $\Delta E$ (kcal/mol) |
|------------------------------|-----------------------------|-----------------------------|-------------------|-----------------|-----------------------|
| NPAC                         | -0.21174                    | -0.05526                    | 0.15648           | 4.26            | 98.19                 |
| [NPAC-Zn <sup>2+</sup> ]     | -0.19886                    | -0.06813                    | 0.13073           | 3.56            | 82.03                 |
| [NPAC-Zn <sup>2+</sup> ]-ATP | -0.22801                    | -0.07609                    | 0.15192           | 4.13            | 95.32                 |

## 15. Live Cell Imaging:

### Cell line and cell culture

**Cell culture:** HuH7 cell lines were prepared from continuous culture in Dulbecco's Modified Eagle's Medium (DMEM, Sigma Chemical Co., St. Louis, MO) supplemented with 10% fetal bovine serum (Invitrogen), penicillin (100  $\mu\text{g}/\text{mL}$ ), and streptomycin (100  $\mu\text{g}/\text{mL}$ ). Cells were initially propagated in 75 cm<sup>2</sup> polystyrene, filter-capped tissue culture flask in an atmosphere of

5% CO<sub>2</sub> and 95% air at 37°C in CO<sub>2</sub> incubator. When the cells reached the logarithmic phase, the cell density was adjusted to 1.0×10<sup>5</sup> per/well in culture media. The cells were then used to inoculate in a glass bottom dish, with 1.0 mL (1.0×10<sup>4</sup> cells) of cell suspension in each dish. After cell adhesion, culture medium was removed. The cell layer was rinsed twice with phosphate buffered saline (PBS) (pH 7.0), and then treated according to the experimental need.

**Cell Imaging Study:** For Fluorescence imaging studies, 1×10<sup>4</sup> HuH7 cells in 1000 μL of medium, were seeded on sterile 35 mm glass bottom culture dish (ibidi GmbH, Germany), and incubated at 37°C in a CO<sub>2</sub> incubator for 10 hours. Then cells were washed with 500 μL DMEM followed by incubation with the **NPAC** (1μM) dissolved in 1000 μL DMEM at 37°C for 1 h in a CO<sub>2</sub> incubator and cells were washed thrice with phosphate buffered saline (PBS) (pH 7.0) to remove excess **NPAC** observed under an Olympus IX71 fluorescence microscope. Images obtained through section scanning were analyzed by DAPI filter with excitation at 339 nm monochromatic laser beams, and emission spectra were integrated over the range 459 nm. The cells were again incubated with Zn<sup>2+</sup> (10μM) for 20 min and excess Zn<sup>2+</sup> was washed thrice with PBS (pH 7.0). Images were captured under microscope using DAPI filter with excitation at 339 nm monochromatic laser beams, and emission spectra were integrated over the range 459 nm. The cells were again incubated with ATP (10μM) for 20 min and excess ATP was washed thrice with PBS (pH 7.0) Images were captured under microscope using DAPI filter with excitation at 339 nm monochromatic laser beams, and emission spectra were integrated over the range 459 nm For all images, the fluorescence microscope settings, such as transmission density, and scan speed, were held constant to compare the relative intensity of intracellular fluorescence.

## 16. Cytotoxicity Assay

*In vitro* studies established the ability of the **NPAC-Zn<sup>2+</sup>** complex to detect ATP in biological system with excellent selectivity. Human cancer cell HuH7 were used as models. To materialize this objective, it is a prerequisite to assess the cytotoxic effect of **NPAC**, **NPAC-Zn<sup>2+</sup>** and **NPAC-Zn<sup>2+</sup>-ATP** complex on live cells. The well-established MTT assay<sup>3</sup> was adopted to study cytotoxicity of above mentioned complexes at varying concentrations. A cytotoxicity measurement for each experiment shows that the **NPAC** does not have any toxicity on the tested human cancer cell HuH7 and **NPAC-Zn<sup>2+</sup>**, **NPAC-Zn<sup>2+</sup>-ATP** complex does not apply significant effect on cell viability at tested concentrations.



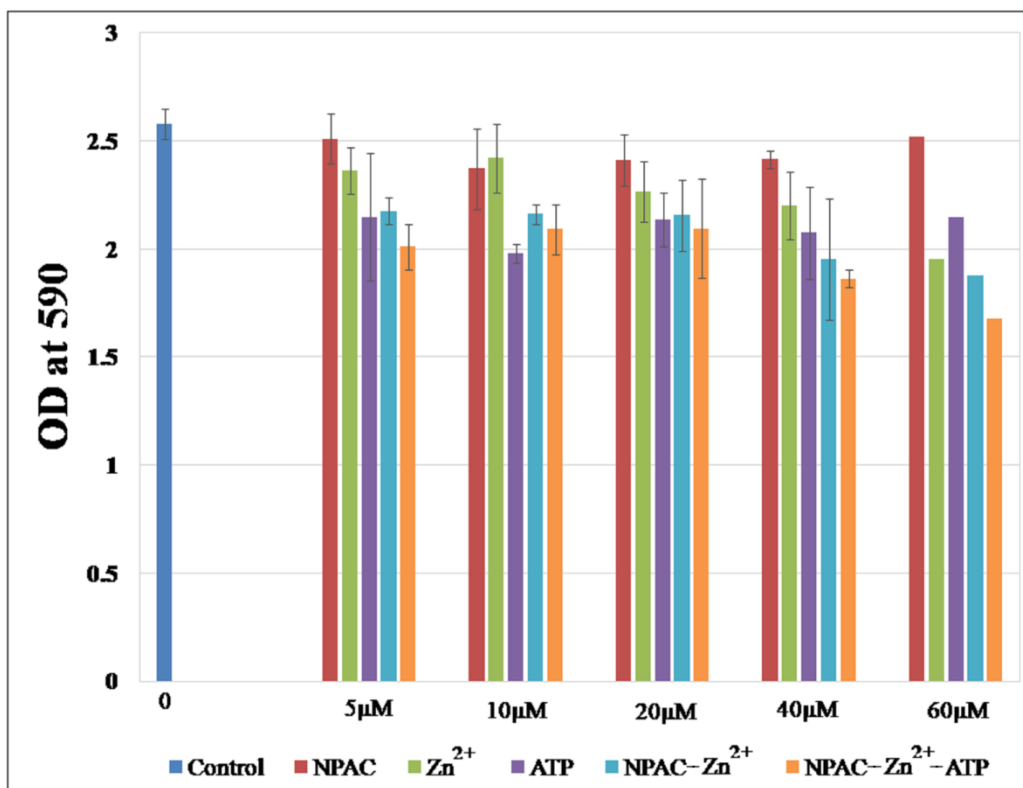

**Fig. S16** MTT assay to determine the cytotoxic effect of NPAC, NPAC-Zn<sup>2+</sup>, NPAC-Zn<sup>2+</sup>-ATP complex on HuH7 cells (Human cancer cell HuH7).

### 17. Quantification of ATP in human cancer cells:

To quantify cellular level of ATP 10<sup>7</sup> HuH7 human cancer cells were harvested by centrifugation at 3000 rpm for 5 minutes followed by washing of the cell pellet with PBS buffer. Cells were again harvested following similar centrifugation. Cell pellets were suspended with 100 µL ice cold deionized water in order to lyse by the osmotic shock. Lysates were further centrifuged and the supernatant has been collected. 1 µL of supernatant has been added with the NPAC-Zn<sup>2+</sup> (1 µM) and the fluorescence signal was measured. The value of fluorescence intensity has been plotted to the standard curve in order to know the concentration of ATP in tested samples. All estimations have been done in triplicate (Table S4).

## 18. Validation of the screening procedure:

The estimation of ATP was validated using different samples of HuH7 cancer cells.  $10^4$  of each cell suspension were centrifuged to collect the cells. The cells were resuspended with 10 mM PBS buffer (pH 7.0) followed by centrifugation. The cell pellets were lysed by osmotic shock with 1ml ice cold deionised water.  $1\mu\text{L}$  supernatant were added with  $1\mu\text{M}$  NPAC-Zn<sup>2+</sup> complex and fluorescence signal were recorded. The fluorescence signal has been recorded for three independent samples of HuH7 cancer cells and all experiments were done in triplicate. The signal to noise ratio were obtained and the screening procedure were validated by calculating Z' score.

**Table S4: Optimization and validation of the screening procedure for ATP level in various samples of HuH7 cancer cells using NPAC-Zn<sup>2+</sup> complex**

| Sample  | Fluorescence Intensity |       |       | Mean  | Standard deviation | Signal*/Noise** | Z'    |
|---------|------------------------|-------|-------|-------|--------------------|-----------------|-------|
|         | Set 1                  | Set 2 | Set 3 |       |                    |                 |       |
| Control | 22.89                  | 22.88 | 22.90 | 22.89 | 0.01               | ----            | ----  |
| S1      | 3.1                    | 3.2   | 3.3   | 3.2   | 0.1                | 0.139           | 0.983 |
| S2      | 3.8                    | 3.7   | 3.6   | 3.7   | 0.1                | 0.161           | 0.982 |
| S3      | 4.0                    | 4.1   | 4.2   | 4.1   | 0.1                | 0.179           | 0.982 |

\*fluorescence intensity for NPAC-Zn<sup>2+</sup>-ATP interaction.

\*\*fluorescence intensity for NPAC-Zn<sup>2+</sup>complex.

# All experiments were performed in compliance with the relevant laws and institutional guidelines. Institutional committee (Visva-Bharati University) has approved the experiments.

The informed consent was obtained for all experiments involving human subjects.

### Reference:

- [1] (a) L. Long, D. Zhang, X. Li, J. Zhang, C. Zhang and L. Zhou, *Anal. Chim. Acta.*, 2013, **775**, 100-105. (b) M. Zhu, M. Yuan, X. Liu, J. Xu, J. Lv, C. Huang, H. Liu, Y. Li, S. Wang and D. Zhu, *Org. Lett.*, 2008, **10**, 1481-1484.
- [2] J. Ratha, K. A. Majumdar, S. K. Mandal, R. Bera, C. Sarkar, B. Saha, C. Mandal, K. D. Saha and R. Bhadra, *Mol. Cell. Biochem.*, 2006, **290**, 113.
